# Supplementary material
Source: Research Square preprint supplement (doi:10.21203/rs.3.rs-8923282/v1)
Supplement: Supplementary file 1 [file 46fc15bce0ef94cfbabf749c.docx]

**Supplementary Information: Effect of proteases on the functional properties of pea protein isolates**

Ashwitha Amina,*, Ourania Gousetia, Gernot J. Abelb, Poul Erik Jensena

a Department of Food Science, University of Copenhagen, Rolighedsvej 26, 1958 Frederiksberg, Denmark.

b Novonesis A/S, Enzyme Research, 2800 Kongens Lyngby, Denmark

*Corresponding author (Email: ashwitha@food.ku.dk; Tel: +4535333222)

**Table of contents**

| Figure S1. Transmission profiles obtained during the centrifugation of hydrolysates at 2300 g for durations ranging from 0 to 60 min using Lumisizer®. | 2 |
| --- | --- |
| Figure S2. Transmission profiles obtained during the centrifugation of emulsions at 2300 g for durations ranging from 0 to 60 min using Lumisizer®. | 3 |
| Table S1. pH and moisture content of gels. | 4 |
| Table S2. Increase in hardness (%) in the gels prepared in the presence of TG. | 5 |


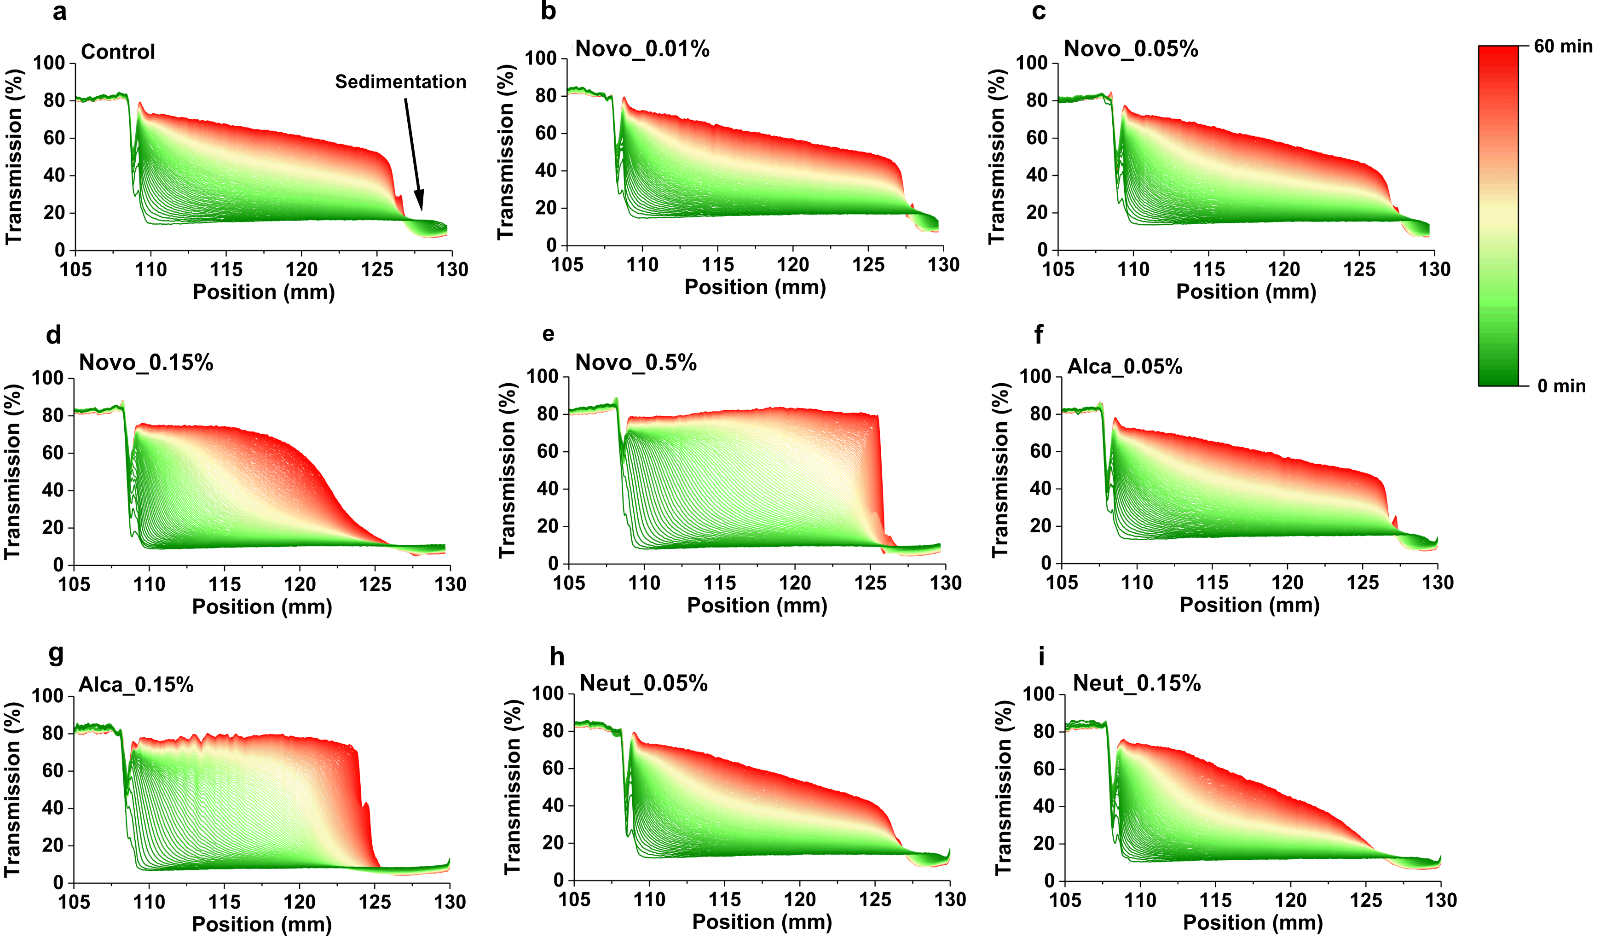


**Fig S1**. Transmission profiles obtained during the centrifugation of hydrolysates at 2300 g for durations ranging from 0 to 60 min using Lumisizer®.


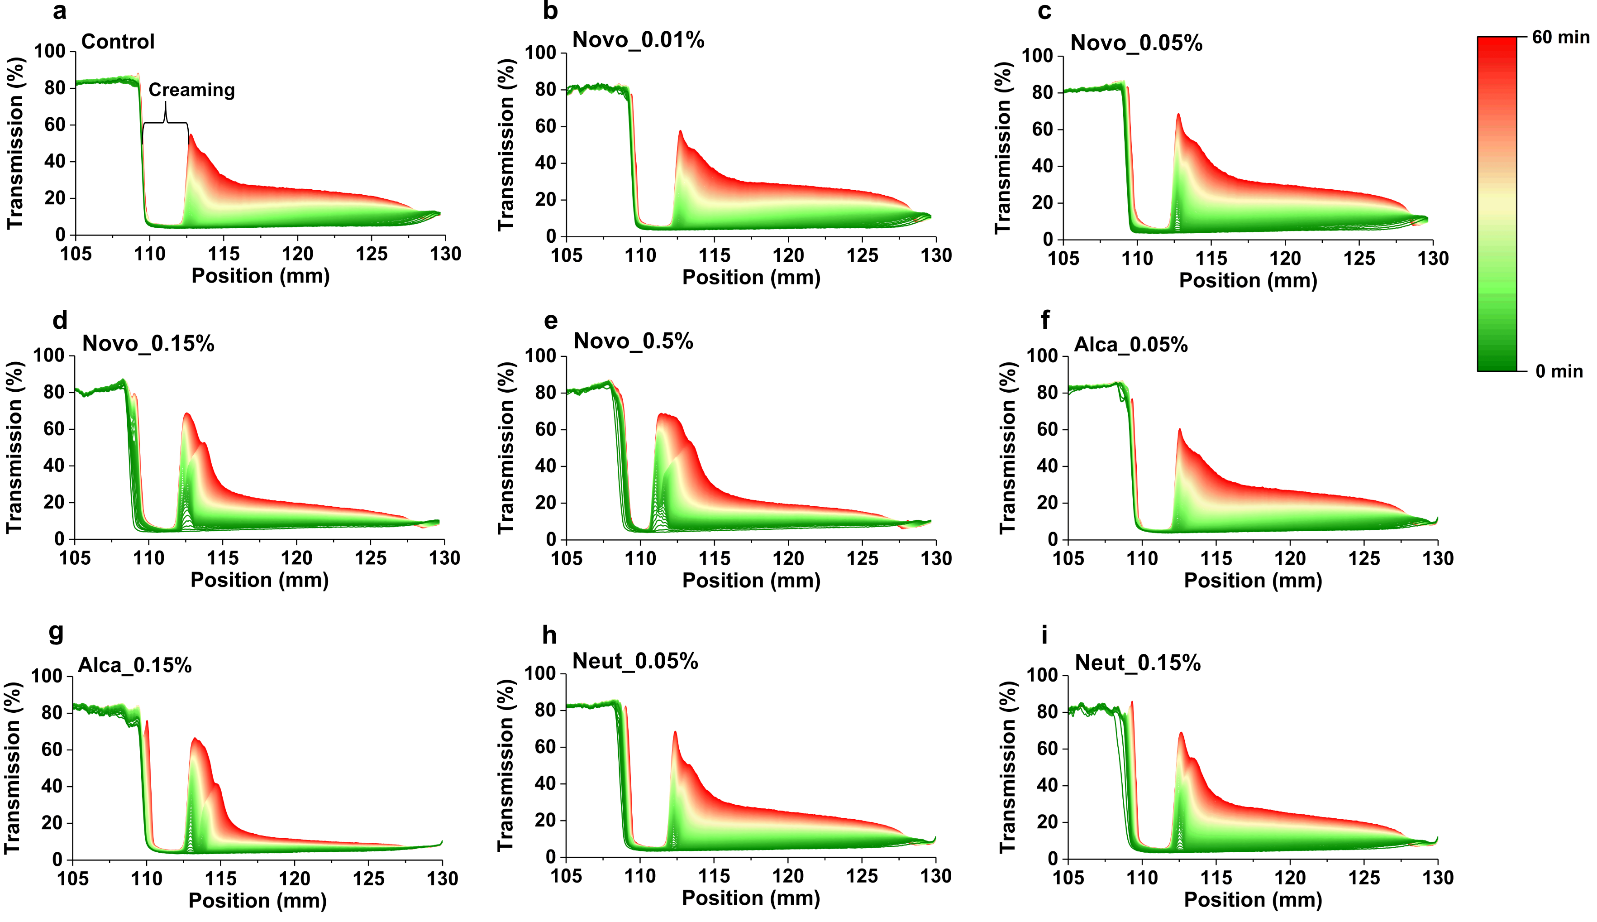


**Fig S2**. Transmission profiles obtained during the centrifugation of emulsions at 2300 g for durations ranging from 0 to 60 min using Lumisizer®.

Table S1. pH and moisture content of gels

| **Sample** | **Initial pH** | | **Final pH** | | **Moisture content (%)** | |
| --- | --- | --- | --- | --- | --- | --- |
| **0% TG** | **3% TG** | **0% TG** | **3% TG** | **0% TG** | **3% TG** |
| Control | 7.35±0.08d | 7.35±0.06d | 4.23±0.05abcd | 4.26±0.04d | 77.92±0.19cd | 75.32±0.78a |
| Novo_0.01% | 7.32±0.04cd | 7.32±0.04cd | 4.14±0.01abc | 4.14±0.01abc | 81.65±0.35h | 76.50±0.28b |
| Novo_0.05% | 7.29±0.02cd | 7.26±0.04cd | 4.24±0.03bcd | 4.19±0.01abcd | 82.54±0.51h | 80.23±3.45g |
| Novo_0.15% | 7.29±0.03cd | 7.14±0.22bc | 4.26±0.02d | 4.26±0.06cd | 77.99±0.22cd | 77.50±0.13bc |
| Novo_0.5% | 6.82±0.08a | 6.82±0.08b | 4.17±0.01abcd | 4.12±0.01a | 79.42±0.13efg | 79.75±0.58fg |
| Alca_0.05% | 7.29±0.05cd | 7.29±0.05cd | 4.13±0.03ab | 4.19±0.01abcd | 78.38±0.36cde | 76.60±0.11b |
| Alca_0.15% | 7.15±0.11bc | 7.15±0.11bc | 4.17±0.07abcd | 4.24±0.04bcd | 75.07±0.74a | 78.39±0.81cde |
| Neut_0.05% | 7.23±0.10cd | 7.23±0.10cd | 4.17±0.11abcd | 4.22±0.11abcd | 78.28±0.35cde | 77.79±1.15c |
| Neut_0.15% | 6.99±0.03ab | 6.99±0.03ab | 4.23±0.04abcd | 4.23±0.01abcd | 77.42±0.47bc | 79.07±0.21def |

One-way ANOVA was conducted to compare datasets between 0% TG and 3% TG treatments, and different letters for each cell denoted significant differences in mean values (p < 0.05).

Table S2. Increase in hardness (%) in the gels prepared in the presence of TG.

| **Sample** | **Increment in hardness compared to non-TG added samples (folds)** |
| --- | --- |
| Control | 2.12±0.48b |
| Novo_0.01% | 2.51±0.32ab |
| Novo_0.05% | 2.76±0.14ab |
| Novo_0.15% | 4.04±0.49a |
| Novo_0.5% | 0.02±0.01c |
| Alca_0.05% | 3.40±1.96ab |
| Alca_0.15% | 2.68±0.04ab |
| Neut_0.05% | 2.71±0.23ab |
| Neut_0.15% | 3.23±0.10ab |
